# Supplementary material
Source: Springer Nature journal article supplement (https://www.springermedizin.de/resource/supplementary/12891_2009_769_MOESM2_ESM.pdf/9506838)

(a)

■ Pain episodes   ■ Accumulation of pain risk

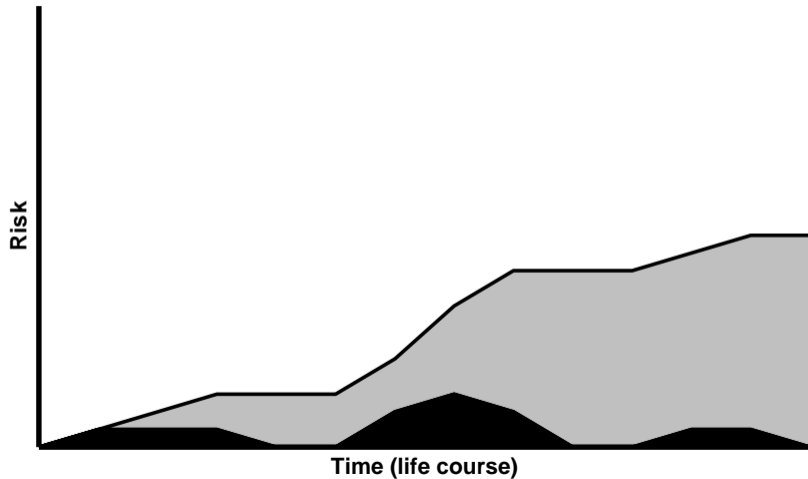

(b)

■ Pain episodes   ■ Episodes of other risk factors  
■ Accumulation of pain risk   ■ Accumulation of pain + other risks

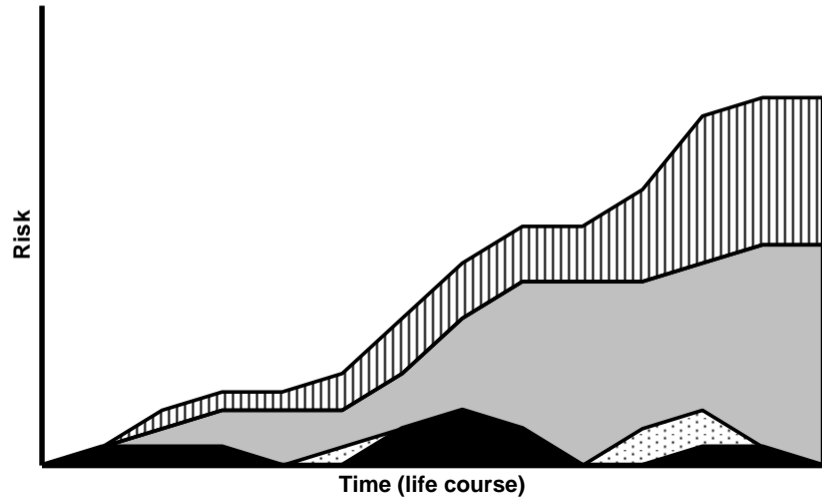

Supplement: MOESM2 [file 9506838]
